# Supplementary material for: Myeloid Derived Suppressor Cells Migrate in Response to Flow and Lymphatic Endothelial Cell Interaction in the Breast Tumor Microenvironment
Source: MDPI journal article supplement (doi:10.3390/cancers14123008), 2022-06-18
Supplement: s1 [file s1]

A

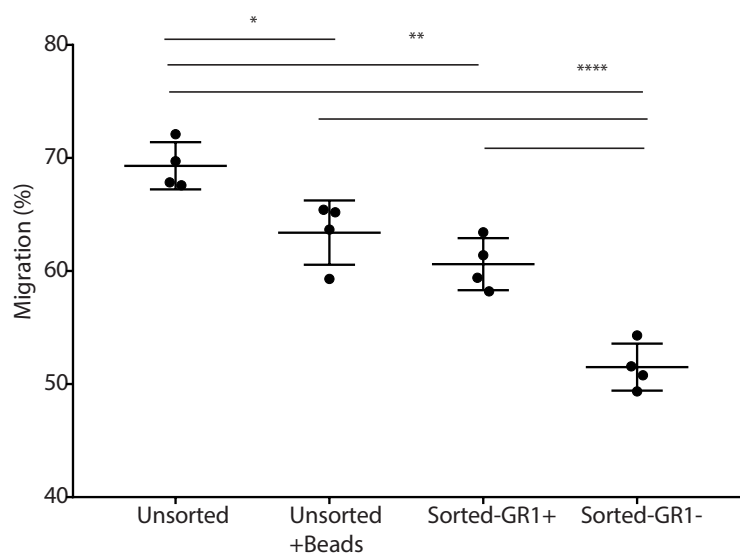

B

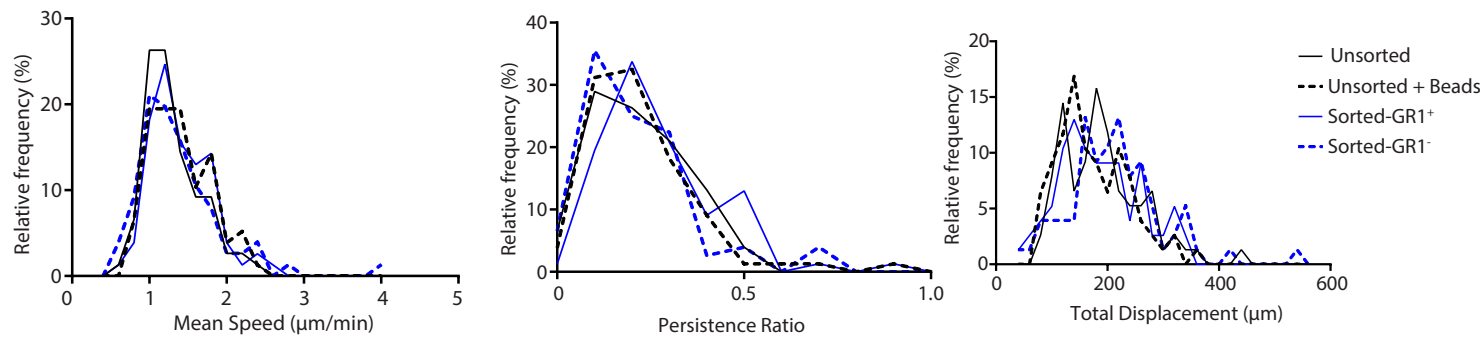

Supplemental Figure S1. Magnetic beads used in separation reduced percent migration of cells.
