# Supplementary figures and images for: Myeloid Derived Suppressor Cells Migrate in Response to Flow and Lymphatic Endothelial Cell Interaction in the Breast Tumor Microenvironment
Source: MDPI journal article supplement (doi:10.3390/cancers14123008), 2022-06-18

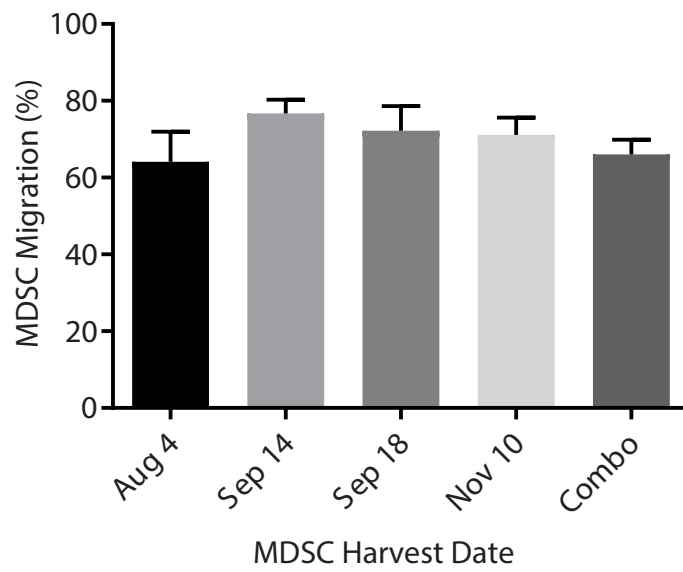

Supplemental Figure S2. Migration characteristics are sensitive to harvest.

Supplement: s1 [file s1]
